# Supplementary material for: Superior performance of mesoporous tin oxide over nano and bulk forms in the activation of a carbonyl group: conversion of bio-renewable feedstock
Source: Royal Society of Chemistry journal article supplement (doi:10.1039/c5cy01252j), 2015-11-09

## **Supporting Information**

### **Superior performance of mesoporous tin oxide over nano and bulk in activation of carbonyl group: Conversion of bio-renewable feedstock**

Vijaykumar S. Marakatti, Pandian Manjunathan, Anand B. Halgeri and Ganapati V. Shanbhag\*

*<sup>a</sup> Materials Science Division, Poornaprajna Institute of Scientific Research (PPISR), Bidalur Post, Devanahalli, Bangalore-562110, India.*

(\*Corresponding authors: shanbhag@poornaprajna.org, Tel: +9180-27408552, Fax: +9180-23619034)

**Figure S1** Nitrogen sorption isotherm of mesostructured tin oxide catalysts at different calcination temperatures.

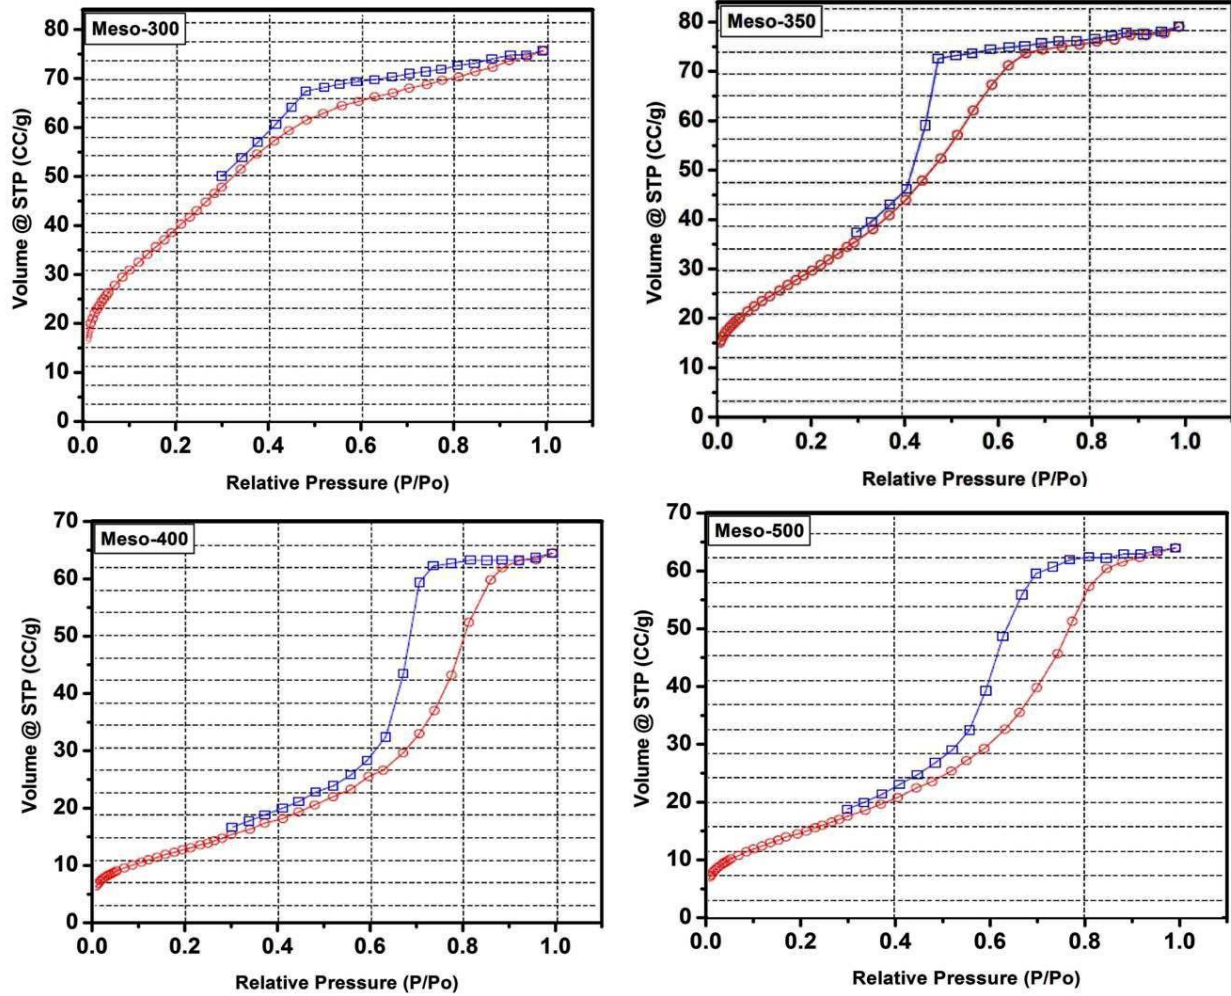

Figure S2 TGA profile of mesoporous tin oxide catalysts.

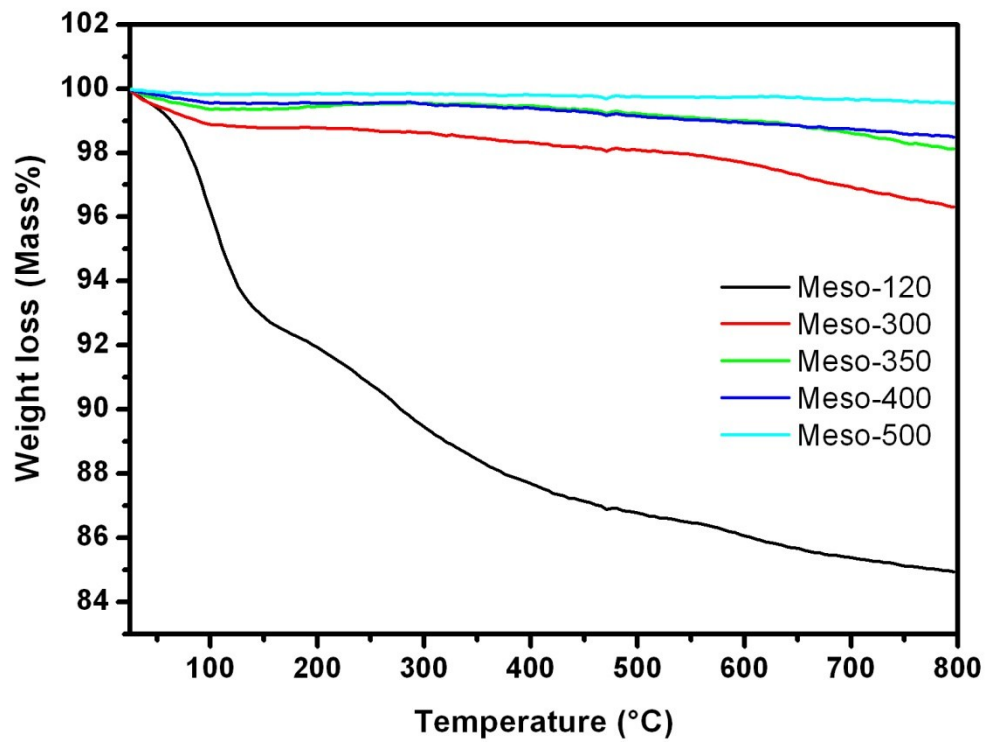

Figure S3 Recyclability of meso-500 tin oxide catalyst for carbonylation of glycerol reaction.

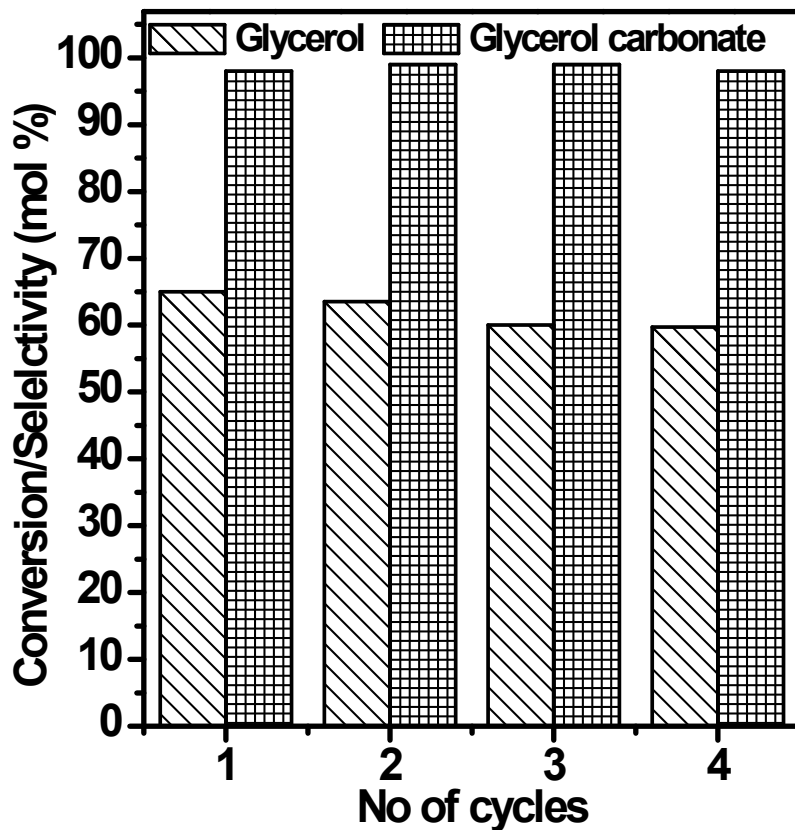

Reaction conditions: Glycerol = 2 g, urea = 1.30 g, catalyst amount = 0.66 g, reaction temperature = 160 ° C, reaction time 4 h.

**Figure S4** TPD Profile of Blank meso-350 in absence of  $\text{NH}_3$  treatment.

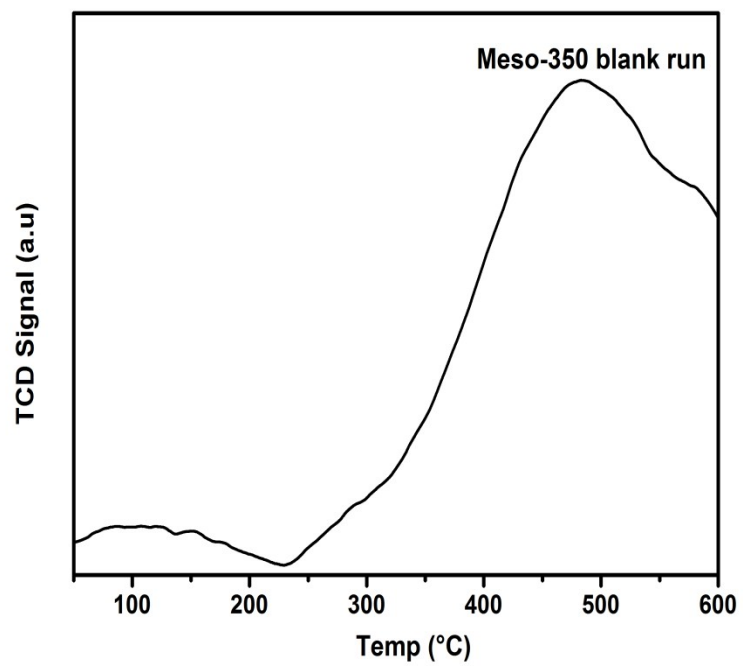

**Table S1** Catalyst recyclability of meso-350 catalyst for Prins reaction

| <b>Catalysts</b> | <b><math>\beta</math>-pinene<br/>conversion<br/>(mol %)</b> | <b>Nopol<br/>selectivity<br/>(mol %)</b> |
|------------------|-------------------------------------------------------------|------------------------------------------|
| Recycle-1        | 76                                                          | 94                                       |
| Recycle-2        | 74                                                          | 93                                       |
| Recycle-3        | 73                                                          | 93                                       |

Reaction conditions:  $\beta$ -pinene = 1.36 g, Paraformaldehyde = 0.6 g, Benzonitrile = 5 ml, catalyst amount = 0.78 g, reaction temperature = 90 °C, reaction time = 10 h.

**Scheme S1** Plausible reaction mechanism of ketalization of glycerol with cyclohexanone over tin oxide catalysts.

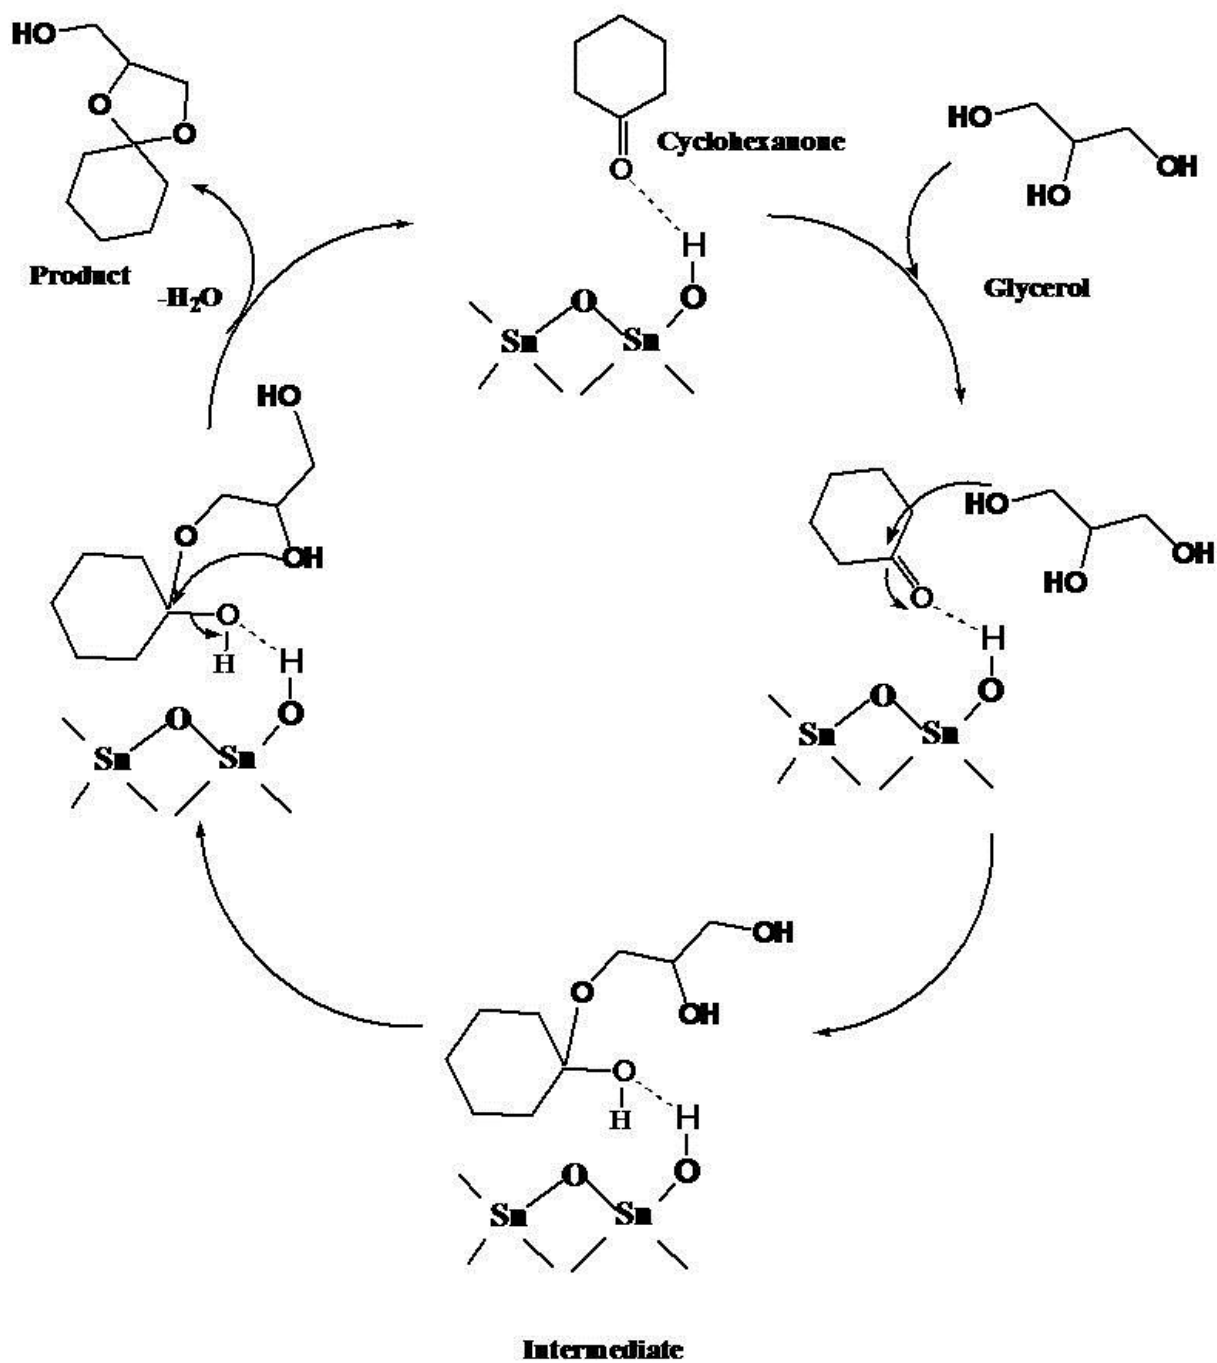

**Scheme S2** Plausible reaction mechanism of acetylation of glycerol with acetic anhydride over tin oxide catalysts.

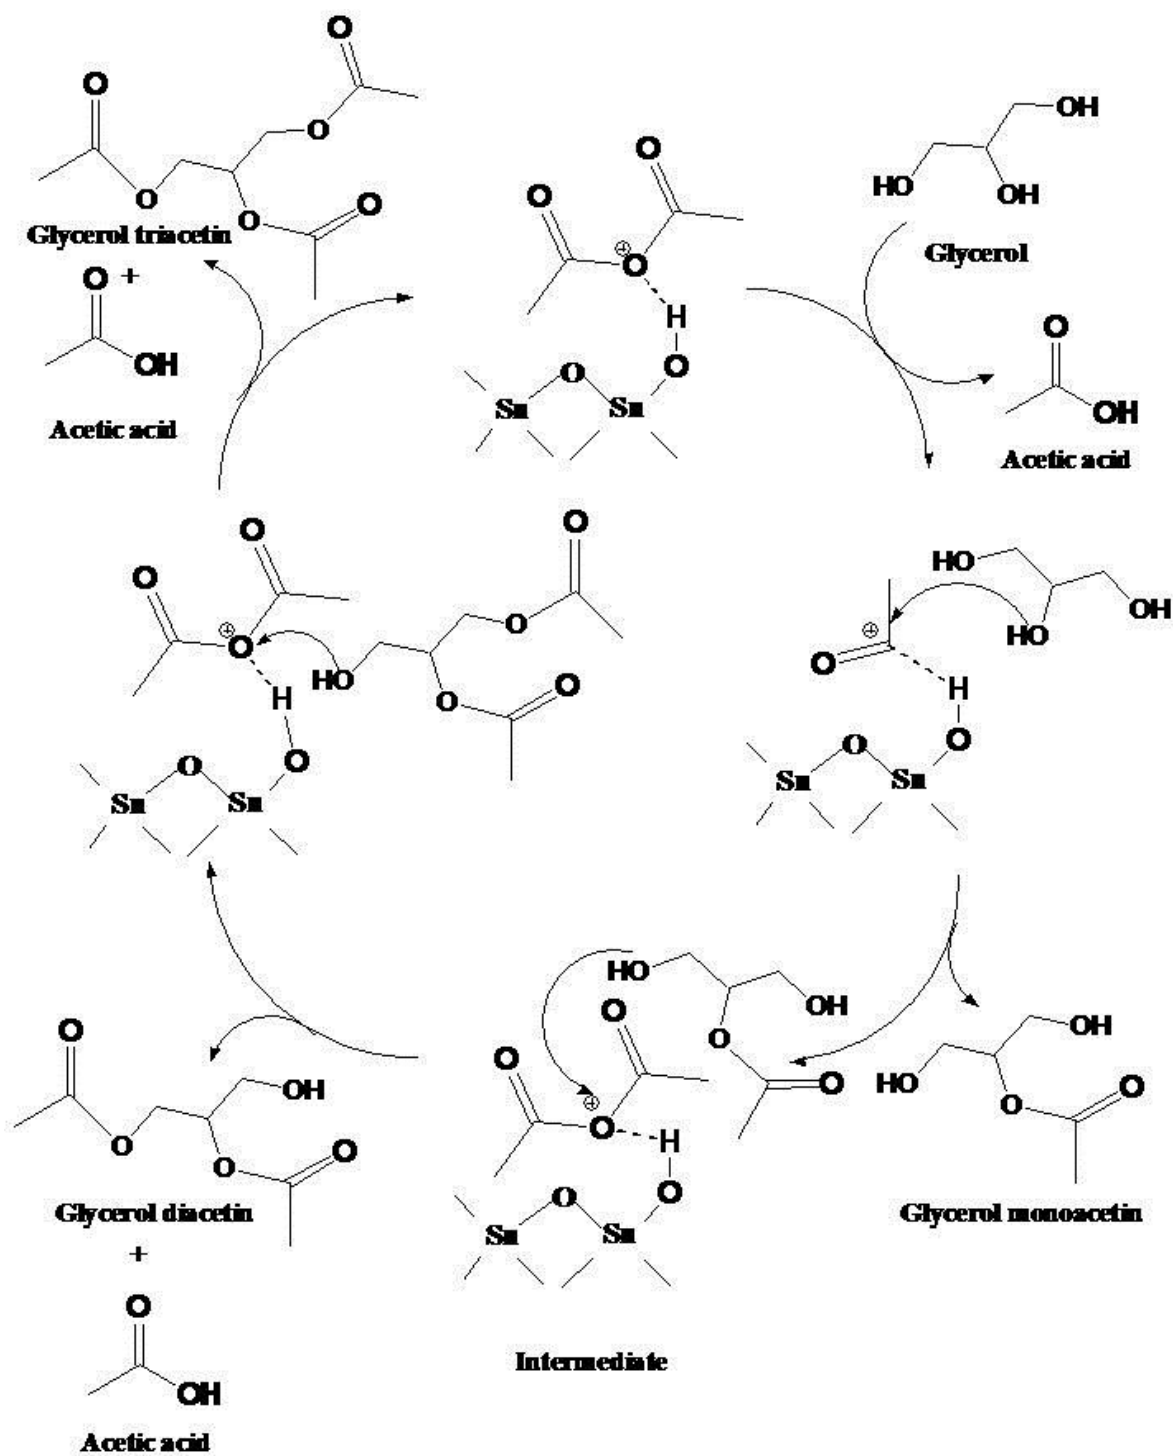

Supplement: c5cy01252j1.pdf [file c5cy01252j1.pdf]
